# Supplementary material for: Moderating Effects of Intention to Screen on the Relationship Between Attitude Towards Screening and Cancer and High Blood Pressure Screening Uptake Among Nigerians
Source: Research Square preprint supplement (doi:10.21203/rs.3.rs-8836769/v1), 2026-02-22
Supplement: Supplementary file 1 [file 3b9e351d6166a536d435c94f.docx]

**RESEARCH QUESTIONNAIRE**

**Section A**

Instruction: Kindly tick you response as appropriate.

1. Age (At last birthday)**:** _______

2. Gender**:**  Female Male Prefer not to say

3. Marital Status**:**  Single Married Divorced/Separated/Widowed

4. Educational Level**:** Primary-education Secondary-education Tertiary

5. Religion**:** Christianity Islam Traditional African Religion Others

6. Which of these cancer screenings have you ever done?

Breast cancer Cervical Cancer Prostate Cancer Colorectal Cancer None

If you answered “No” to No 6, have you ever done any cancer screening at all? Yes No

Do you intend to do any cancer screenings at all? Yes No

Do you intend to do blood pressure screening at all? Yes No

Have you ever done blood pressure screening? Yes No

Have you had a blood pressure check this year? Yes No

**Section B**

Response format: CD = Completely disagree PD = Partially disagree N = Neither agree nor disagree, PA = Partially agree CA = completely agree

| Nos. | Items | CD | PD | N | PA | CA |
| --- | --- | --- | --- | --- | --- | --- |
| 1 | I want to undergo cancer screening at regular intervals. |  |  |  |  |  |
| 2 | I want to undergo cancer screening soon. |  |  |  |  |  |
| 3 | I want to receive information about cancer screening tests. |  |  |  |  |  |
| 4 | If there is anything I wonder about cancer screening, I will research it to find out. |  |  |  |  |  |
| 5 | When I undergo a cancer screening test, I will follow the results. |  |  |  |  |  |
| 6 | I encourage people around me to undergo cancer screening. |  |  |  |  |  |
| 7 | Giving information about cancer screenings on television, on the internet and in the newspaper has a positive effect on my screening. |  |  |  |  |  |
| 8 | Cancer screening recommendation by a health worker increases my likelihood of being screened. |  |  |  |  |  |
| 9 | If someone close to me is diagnosed with cancer, it doesn't increase the chance of undergoing cancer screening. |  |  |  |  |  |
| 10 | When I undergo a cancer screening, I think that I'm doing something good for myself. |  |  |  |  |  |
| 11 | I only undergo cancer screening tests because I want to. |  |  |  |  |  |
| 12 | I don’t want to undergo cancer screening because I’m afraid of bad test results. |  |  |  |  |  |
| 13 | Even if I don’t have any complaints, I would undergo cancer screening. |  |  |  |  |  |
| 14 | When the center of cancer screening is too far away to go, I don’t undergo screening. |  |  |  |  |  |
| 15 | I can't find time to undergo cancer screening. |  |  |  |  |  |
| 16 | I forgot to apply for cancer screening. |  |  |  |  |  |
| 17 | I think it's unnecessary to undergo cancer screening. |  |  |  |  |  |
| 18 | I think that I’m not the right age for cancer screening. |  |  |  |  |  |
| 19 | I'm afraid cancer screening tests will hurt me. |  |  |  |  |  |
| 20 | I'm concerned about the side effects of cancer screening tests. |  |  |  |  |  |
| 21 | I think the procedures of cancer screening are embarrassing. |  |  |  |  |  |
| 22 | I don't trust the results of cancer screening tests. |  |  |  |  |  |
| 23 | I don't need to undergo cancer screening because I think that cancer won’t happen to me. |  |  |  |  |  |
| 24 | I have more important things to do than cancer screening. |  |  |  |  |  |

Section C

Response format: CD = Completely disagree PD = Partially disagree N = Neither agree nor disagree, PA = Partially agree CA = completely agree

| Nos. | Items | 1 | 2 | 3 | 4 | 5 |
| --- | --- | --- | --- | --- | --- | --- |
| 1 | I want to undergo hypertension/high blood pressure screening at regular intervals. |  |  |  |  |  |
| 2 | I want to undergo hypertension/high blood pressure screening soon. |  |  |  |  |  |
| 3 | I want to receive information about hypertension/high blood pressure screening tests. |  |  |  |  |  |
| 4 | If there is anything I wonder about hypertension/high blood pressure screening, I will research it to find out. |  |  |  |  |  |
| 5 | When I undergo a hypertension/high blood pressure screening test, I will follow the results. |  |  |  |  |  |
| 6 | I encourage people around me to undergo hypertension/high blood pressure screening. |  |  |  |  |  |
| 7 | Giving information about hypertension/high blood pressure screenings on television, on the internet and in the newspaper has a positive effect on my screening. |  |  |  |  |  |
| 8 | Hypertension/high blood pressure screening recommendation by a health worker increases my likelihood of being screened. |  |  |  |  |  |
| 9 | If someone close to me is diagnosed with hypertension/high blood pressure, it doesn't increase the chance of undergoing hypertension/high blood pressure screening. |  |  |  |  |  |
| 10 | When I undergo a hypertension/high blood pressure screening, I think that I'm doing something good for myself. |  |  |  |  |  |
| 11 | I only undergo hypertension/high blood pressure screening tests because I want to. |  |  |  |  |  |
| 12 | I don’t want to undergo hypertension/high blood pressure screening because I’m afraid of bad test results. |  |  |  |  |  |
| 13 | Even if I don’t have any complaints, I would undergo hypertension/high blood pressure screening. |  |  |  |  |  |
| 14 | When the center of hypertension/high blood pressure screening is too far away to go, I don’t undergo screening. |  |  |  |  |  |
| 15 | I can't find time to undergo hypertension/high blood pressure screening. |  |  |  |  |  |
| 16 | I forgot to apply for hypertension/high blood pressure screening. |  |  |  |  |  |
| 17 | I think it's unnecessary to undergo hypertension/high blood pressure screening. |  |  |  |  |  |
| 18 | I think that I’m not the right age for hypertension/high blood pressure screening. |  |  |  |  |  |
| 19 | I'm afraid hypertension/high blood pressure screening tests will hurt me. |  |  |  |  |  |
| 20 | I'm concerned about the side effects of hypertension/high blood pressure screening tests. |  |  |  |  |  |
| 21 | I think the procedures of hypertension/high blood pressure screening are embarrassing. |  |  |  |  |  |
| 22 | I don't trust the results of hypertension/high blood pressure screening tests. |  |  |  |  |  |
| 23 | I don't need to undergo hypertension/high blood pressure screening because I think that hypertension/high blood pressure won’t happen to me. |  |  |  |  |  |
| 24 | I have more important things to do than hypertension/high blood pressure screening. |  |  |  |  |  |
